# Supplementary figures and images for: MicroRNA expression in human endometrial adenocarcinoma
Source: Springer Nature journal article supplement (doi:10.1186/s12935-014-0088-6), 2014-11-13

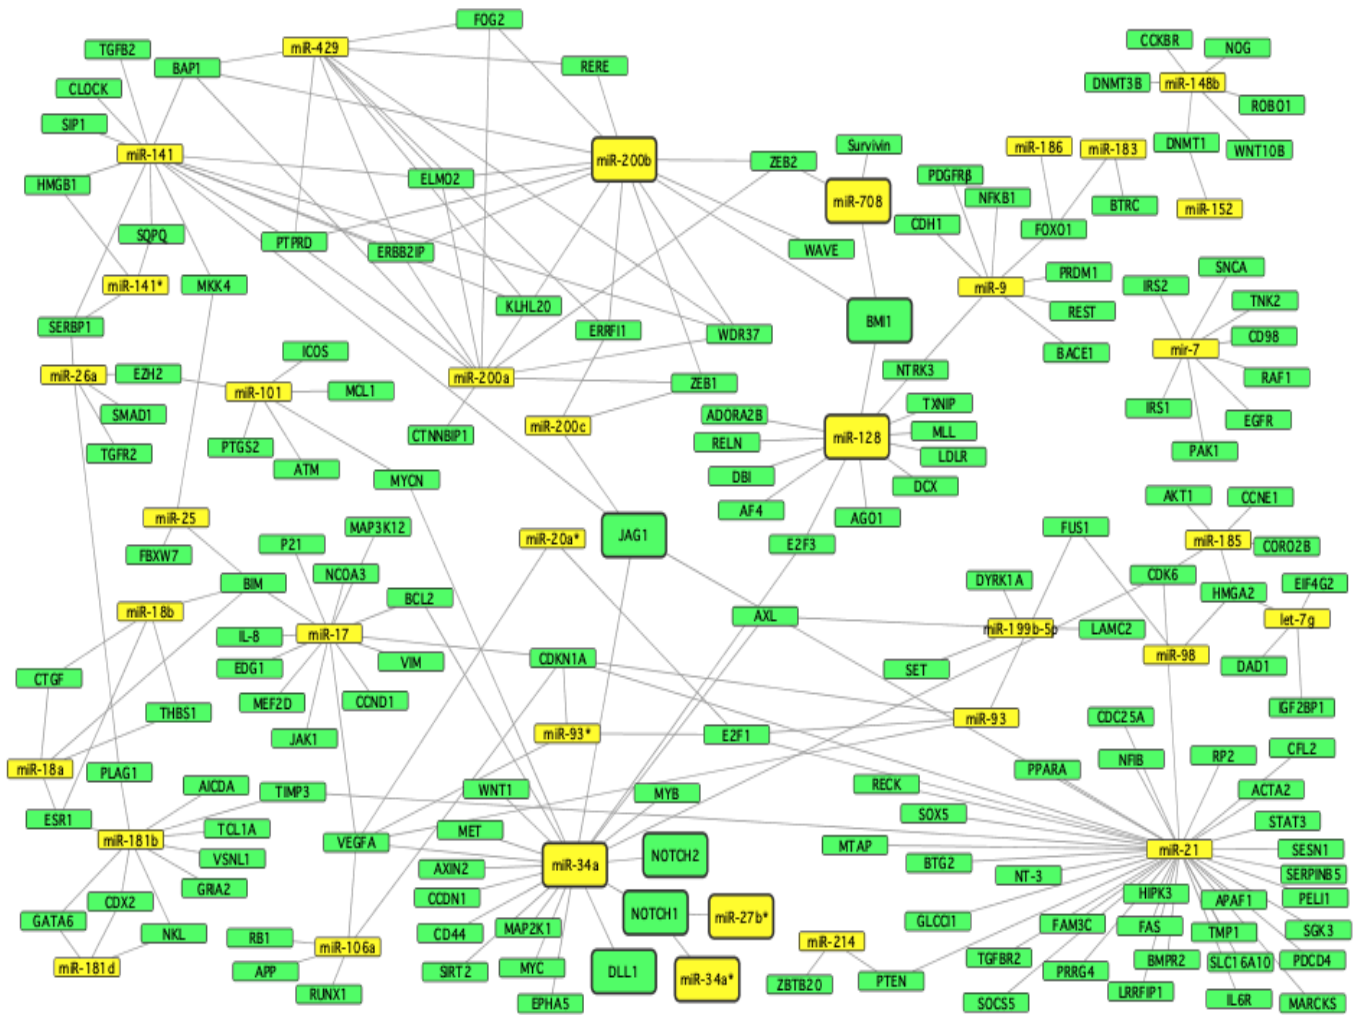

Supplement: MOESM8 [file 9760526]
